# Supplementary material
Source: Springer Nature journal article supplement (https://www.springerprofessional.de/resource/supplementary/40537_2013_3_MOESM11_ESM.pdf/10796330)

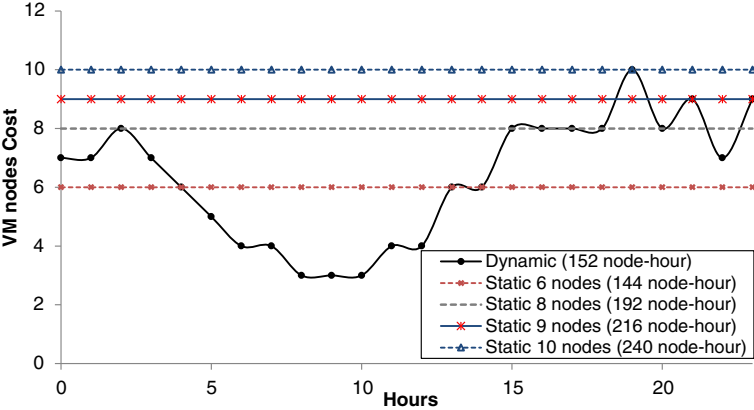

Supplement: MOESM11 [file 10796330]
